1 **Revisiting the phosphotyrosine binding pocket of Fyn SH2 domain led**  
2 **to the Identification of novel SH2 superbinders**

3

4 Shuhao Li<sup>1,2#</sup>, Yang Zou<sup>1#</sup>, Dongping Zhao<sup>1,2</sup>, Yuqing Yin<sup>2</sup>, Jingyi Song<sup>1</sup>, Ningning He<sup>1</sup>, Huadong Liu<sup>3</sup>, Dongmeng  
5 Qian<sup>1\*</sup>, Lei Li<sup>1,4\*</sup>, Haiming Huang<sup>2\*</sup>,

6

7 1 School of Basic Medicine, Qingdao University, Qingdao, 266021, China

8 2 Shanghai Asia United Antibody Medical Co., Ltd, Shanghai, 201203, China

9 3 Center for Mitochondrial Biology and Medicine, The Key Laboratory of Biomedical  
10 Information Engineering of Ministry of Education, School of Life Science and Technology,  
11 Xi'an Jiaotong University, Xi'an, 710049, China.

12 4 The Cancer Institute, Qingdao University, Qingdao 266061, China.

13

14 # These authors contributed equally to this work.

15 \* To whom correspondence should be addressed.

16 E-mail: Haiming Huang([haiming.huang@auambio.com](mailto:haiming.huang@auambio.com)) ,

17 Lei Li([leili@qdu.edu.cn](mailto:leili@qdu.edu.cn)),

18 Dongmeng Qian([qiandongmeng@sina.com](mailto:qiandongmeng@sina.com))

19

20

21 **Abstract**

22  
23 Protein engineering through directed evolution is an effective way to obtain proteins with novel  
24 functions with the potential applications as tools for diagnosis or therapeutics. Many natural  
25 proteins, largely antibodies as well as some non-antibody proteins, have undergone directed  
26 evolution in vitro in the test tubes in the laboratories around the world, resulted in the  
27 numerous protein variants with novel or enhanced functions. In this study, we constructed a  
28 Fyn SH2 variant library by randomizing the 8 variable residues in its phosphotyrosine (pTyr)  
29 binding pocket. Selection of this library by a pTyr peptide from MidT antigen led to the  
30 identification of SH2 variants with enhanced affinities to the peptide, compared to the wild  
31 type SH2, by EC50 assay. Fluorescent polarization (FP) was then applied to quantify the binding  
32 affinity of the newly identified SH2 variants. As a result, three SH2 variants, named V3, V13 and  
33 V24, have comparable binding affinities with the previously identified SH2 triple-mutant  
34 superbinder (refer to Trm). Biolayer Interferometry (BLI) assay was employed to disclose the  
35 kinetics of the binding of these SH2 superbinders, in addition to the wild type SH2, to the  
36 phosphotyrosine peptide. The results indicated that all the SH2 superbinders have two-orders  
37 increase of the dissociation rate when binding the pTyr peptide while there was no significant  
38 change in their associate rates. The previously identified SH2 superbinder Trm as well as the  
39 V13 and V24 discovered in this study have cross-reactivity with the sulfotyrosine (sTyr)  
40 containing peptide while the wild type SH2 does not. Intriguingly, though binding the pTyr  
41 peptide with comparable affinity with other SH2 superbinders, the V3 does not bind to the sTyr  
42 peptide, implying it binds to the pTyr peptide with a different pattern from the other  
43 superbinders. The newly identified superbinders could be utilized as tools for the identification  
44 of pTyr-containing proteins from tissues under different physiological or pathophysiological  
45 conditions and may have the potential in the therapeutics.

46

47

48 **Keywords:** SH2 superbinder, directed evolution, phage display, protein-peptide interaction,  
49 phage displayed library construction and selection

50



52

## 53 **Introduction**

54

55 Directed evolution is a process to alter or optimize protein functions[1]. Natural proteins have  
56 undergone natural selection to achieve the optimal functions for the physiological process.  
57 Nonetheless, only an infinitesimal fraction of the protein sequence space have been explored  
58 by natural proteins [2]. It is very attractive to exploit directed evolution to optimize protein  
59 functions or acquire novel functions[3-6]. There are two major steps in directed evolution, 1)  
60 Mutation of a parental protein, usually on its interaction surface, to obtain a variant library,  
61 mostly presented on the surface of a display system(eg. phage, yeast, etc), as the source of the  
62 novel proteins. 2) Screen of the library by selective pressure with the purpose of getting protein  
63 variants with anticipated functions. For example, a synthetic antibody library is usually  
64 constructed by using a natural antibody as a template/scaffold. The CDR(Complementarity  
65 Determining Region) randomization of the scaffold antibody results in a synthetic antibody  
66 library, in which antibodies for diverse antigens could be selected out[7, 8]. In addition, protein  
67 engineers have utilized the non-antibody scaffolds to explore the possibility of obtaining  
68 proteins to bind diverse ligands other than the cognate ones, such as Fibronectin type III  
69 domain, which is an evolutionary conserved domain of the extracellular protein fibronectin. By  
70 diversifying its three loops, i.e. BC, DE and FG loops, protein engineers were able to construct a  
71 FN3 variant library. Multiple FN3 variants with high affinity and high specificity to their  
72 respective targets have been reported[3-5]. This method was termed monobody technology  
73 and was subsequently adopted by biotechnology industry[6]. Similarly, the DARPin and Affibody  
74 technologies make use of ankyrins and the Z domain of protein A, respectively, to generate  
75 antibody mimetic proteins for the diagnostic and therapeutic applications [9, 10].

76

77 In addition to the extracellular proteins mentioned above, intracellular proteins have been  
78 harnessed as the scaffolds for proteins with novel functions. For example, the SH3(Src  
79 Homology 3)domain of Fyn kinase were randomized at its Src and RT loops and resulted in a Fyn  
80 SH3 variant library [11]. The D3 variant, which targets extra-domain B of fibronectin, was  
81 selected from this library. Therefore it opened up new biomedical opportunities for the in vivo

82 imaging of solid tumors and for the delivery of toxic agents to the tumor vasculature[11].  
83 Ubiquitin is a 76 amino acids polypeptide relating to protein degradation by the proteasome  
84 system, in which the target proteins are ubiquitinatedlabelled ubiquitins by the E1/E2/E3  
85 cascade reaction. The ubiquitin was randomized on its binding surface of its cognate ligands to  
86 acquire novel functions, i.e. as inhibitors or activators of the targets in the proteasome system,  
87 thereby to be utilized as tools to manipulate the protein degradation process [12]. This allowed  
88 the development of potential new therapeutics as well.

89  
90 Besides obtaining novel functions from parental proteins, directed evolution is also widely used  
91 to get protein variants with enhanced functions, usually higher binding affinity. For example, in  
92 antibody in vitro affinity maturation, the antigen binding surface, i.e. the CDR region, is usually  
93 randomized by site directed mutagenesis to construct a library[13-16]. With affinity selection by  
94 its cognate antigen, variant antibodies with more than 10-fold increasing in affinity could be  
95 usually obtained [17, 18]. Moreover, intracellular proteins could also be engineered to get high  
96 affinity binders to their cognate ligands. For example, SH2 (Src Homology 2)domain is a modular  
97 domain that binds selectively to the phosphotyrosine(pTyr)-containing peptides in its cognate  
98 binding proteins[19] in the cell signaling pathway with an affinity in the micromolar range [20].  
99 In a previous study, an SH2 superbinder was identified from a Fyn SH2 variant library, in which  
100 15 amino acid residues in the SH2 pTyr binding pocket were randomized[20]. The superbinder,  
101 which has an affinity to the phosphotyrosine (pTyr) containing peptides in the single digit  
102 nanomolar range, was subsequently applied as a tool to enrich pTyr-containing  
103 peptides/proteins, comparing favorably to the conventional anti-pTyr antibodies [21]. In  
104 addition, the superbinder not only achieved the function of binding to pTyr peptides with an  
105 enhanced binding affinity, but also gained a capacity of binding to sulfotyrosine [21].  
106 Furthermore, the Fyn SH2 superbinder as well as its counterparts (Grb2 SH2&Src SH2) inhibited  
107 the EGFR pathway when expressed in vivo, bearing the potential of therapeutic reagents  
108 [20][22]. When looking into the selected SH2 variants from the library, we noticed that 7 of the  
109 15 amino acid residues are invariable, showing they are highly conserved during the directed  
110 evolution imposed by the selection pressure from the pTyr-containing peptides. In this study,

111 we randomized the rest 8 variable residues in the pTyr binding pocket of Fyn SH2 to minimize  
112 the theoretical library diversity with the aim to select extra SH2 variants with yet tighter binding  
113 affinities to the pTyr peptides. Over one billion of Fyn SH2 variants displayed at the surface of  
114 M13 bacteriophages with the designed mutation were biopanned by a pTyr-containing peptide  
115 with the sequence of EPQpYEEIPIYL. After four rounds of selection, we identified three more  
116 pTyr peptide superbinders, two of which share the sequence features with the previously  
117 identified Fyn superbinder Trm. The third variant, named V3, has distinct sequence features.  
118 Interestingly, variant V3, though binding to phosphotyrosine with the comparable affinity with  
119 the original superbinder, does not have the ability binding to sulfotyrosine in ELISA assay,  
120 indicating different mutation pattern in the pTyr binding pocket could confer the variant  
121 distinct function.

122

123

## 124 **Results**

### 125 *The construction of an SH2 variant library and quality control by next generation sequencing*

126 To construct an SH2 variant library, we randomized the 8 residues(i.e.  $\alpha$ A3, BC1,BC2,BC3,  $\beta$ C1,  
127  $\beta$ C3,  $\beta$ D3,  $\beta$ D6 hereafter referred to position 1 to 8, respectively) (Figure 1a and Figure S2) in  
128 the Fyn SH2 domain pTyr binding pocket by Kunkel method[23, 24]. Three oligos, which covered  
129 the above 8 residues in the template SH2 domain in three regions, were designed for mutation  
130 (Figure 1a). In each position, the oligos for Kunkel reaction was doped to bias to the wild type  
131 nucleotides(see Material&Methods), resulting in the translated residue as wild type amino acid  
132 at approximately 50%, while the other 19 amino acids share the rest 50% (Table S1). The Kunkel  
133 reaction was conducted as described [25] and in the Material&Methods section. The resulting  
134 Kunkel products were transformed into E. coli SS320, which were pre-infected by helper phage  
135 M13KO7 for phage packing, using electroporation. The diversity of the constructed phage  
136 display Fyn SH2 variant library was  $1.27 \times 10^9$  as determined by clone titration.

137

138 To further characterize the library, we used PCR to amplify the coding DNA sequences of the  
139 Fyn SH2 variants and subject for deep sequencing. As a results, 5.9 million high quality DNA  
140 sequences coding Fyn SH2 variants were retrieved from the deep sequencing results (Table S2).  
141 Of these sequences identified, 3.6 million (~60%) have the designed mutations at those 8  
142 positions while the rest have unexpected mutations beyond the 8 positions, likely due to the  
143 mutations introduced by the PCR amplification and/or sequencing errors. Among the ~3.6  
144 million sequences with designed mutations, about 55% (2 million) are unique when translated  
145 into amino acids. Further analysis of the amino acid distribution of the 5.9 million Fyn SH2  
146 variants showed that the actual mutation of the variant library according with the theoretical  
147 design with minor exceptions as show in Figure 1b and Table S1

148

### 149 *Library panning against a pTyr peptide*

150 The library was subject to phage biopanning against a biotinylated peptide EPQpYEEIPIYL  
151 derived from protein MidT, which is a cognate ligand of the wild type Fyn SH2[26]. The library  
152 phage was pre-incubated with a non-phosphorylated peptide EPQYEEIPIYL, which was

153 immobilized in the wells of a Maxisorp microplate pre-coated with streptavidin. The phage  
154 supernatant was then transferred to the wells with the target peptide EPQpYEEIPIYL to enrich  
155 the binding phages. Bound phages were eluted and *E.coli XL1-Blue* were infected by the eluted  
156 phages for amplification. The amplified phages were applied as the input for the next round of  
157 panning. After 4 rounds of panning, the amplified phage pools from each round were applied in  
158 an ELISA assay to test their binding to the EPQpYEEIPIYL peptide (see Material & Methods for  
159 details). As indicated in Figure 2a, starting from round 3, the phage pools bound specifically to  
160 the phosphotyrosine peptide, but not the non-phosphorylated one, indicating the enrichment  
161 of the pTyr-specific binding phages.

162  
163 To separate single clones that specifically bind to the pTyr peptide, we infected *E.coli XL1-Blue*  
164 by phage solution from the enriched rounds (i.e. round 3 and round 4) and plated them on the  
165 Carb-positive plate. 192 single bacteria colonies were picked and phage solution were  
166 generated by M13KO7 infection. Those 192 phage solution were applied in ELISA to confirm  
167 their bindings to pTyr peptide EPQpYEEIPIYL. The clones with OD<sub>450</sub> ratio (pTyr/non-pTyr)  
168 greater than 5 were marked as positive binders and subject to DNA sequencing. It turned out  
169 that 22 unique clones, including the wild type Fyn SH2, were identified. We retrieved the 8  
170 residues from each of those 22 clones and generated multi-alignment logo by the online tool  
171 WebLogo(<https://weblogo.berkeley.edu/>). The logo in Figure 2b illustrated that K7 and E2 is  
172 very conserved, implying that they play crucial roles to form the structure of the SH2 domain  
173 and/or maintain the pTyr peptide binding function. S3 could only be replaced by Threonine and  
174 A5 could only be replaced by Glycine. K8 either retains the wild type residue Lysine or adapts to  
175 residue Leucine, except one variant has Isoleucine at this position. The mutation scope of S6 is  
176 restricted to hydrophobic residues Alanine and Valine. K1 and T4 are the most variable  
177 positions as they can be replaced by more than 5 different residues other than the wild type  
178 ones.

179  
180 We then purified all these 22 variants as well as the previously identified superbinder SH2 as  
181 His-tag proteins and quantified their binding abilities to EPQpYEEIPIYL peptide by EC50 assay



182 (Table 1 and Figure S1). We classified the clones into three groups based on their EC<sub>50</sub> value, i.e.  
183 the low affinity (EC<sub>50</sub>>1000nM) variants, moderate affinity (500nM<EC<sub>50</sub><1000nM) variants  
184 and high affinity (EC<sub>50</sub><500nM) variants. We firstly noticed that the single mutation at K8L (i.e.  
185 the variant V1) is enough to increase the binding affinity of the SH2 domain to the pTyr peptide.  
186 The variant V10 (T4V/K8L), which has a further mutation at position 4, binds to the pTyr peptide  
187 even tighter, with a EC<sub>50</sub> value of 175nM. The synergistic effect of the mutations at those two  
188 position was also reported previously [20]. The triple mutant with the mutation T4V/S6A/K8L,  
189 which has an additional mutation t position 6, was identified as a superbinder previously [20].  
190 In this study, the EC<sub>50</sub> value of the triple mutant is 8-fold (21nM) smaller than that of the  
191 double mutant variant V10 (T4V/K8L), which verified that the triple mutant is a superbinder to  
192 the pTyr peptide and confiremed the synergistic contribution of S6A mutation with T4V/K8L  
193 mutation. The contribution of K8L to the binding has been exemplified in the previous study as  
194 it is located in the center of a hydrophobic patch formed by the T4V/S6A/K8L residues [20]. We  
195 noticed that among those 22 variants, 9 of them have K8L mutation and their binding affinities  
196 to the pTyr peptide all increased as the EC<sub>50</sub> values ranged from 21nM to 500nM. For those 9  
197 variants, if mutation at positon 4 and/or position 6 added as in the case of the triple mutant,  
198 the higher affinities achieved, e.g. V13, V24, etc. However, if the mutations occurred only at the  
199 first three positions, either single or double mutation, i.e. V16, V18, V21, V23, those variants we  
200 got in this study didn't show affinity increase at all. As seen in Table 2, there are 6 variants (ie  
201 V2, V4, V6, V7, V19 and V22) have T6V mutation at position 6. Although 5 of them (except for  
202 V2) have mutation at position 4, which is similar to the triple mutant, the binding affinities of  
203 them didn't increase either. The reason might be that those mutants don't contain K8L  
204 mutation at position 8, which is crucial for the high affinity binding. The fact that T6V and K8L  
205 don't co-exist in one variant implies that T6V mutation and K8L mutation exclude one another  
206 during the *in vitro* evolution.

207  
208 Variant V3 has mutations at position3 (T3S), position4 (T4W) and position 5(A5G). Initially, the  
209 DNA sequencing results showed that there was an ochre stop codon TGA at the position 4,  
210 implying an invalid translation/display of the full length Fyn SH2 variant. However, as there

211 were more than 10 clones sharing the same mutations (i.e. T3S/T4[ochre stop codon]/A5G) and  
212 were all ELISA positive, suggesting this TGA must be translated into a certain amino acid in this  
213 case. We expressed and purified the variant V3 protein and submitted it for mass spectrometry  
214 assay identification. The result indicated that the TGA was translated into residue Tryptophan  
215 (Figure 3a), so we decoded TGA codon into tryptophan in this case. Furthermore, the EC50 of  
216 V3(T3S/T4W/A5G) is 15 nM(Figure 3b), which is very close to the triple mutant (EC50=21nm).  
217 Therefore we identified a new mutation pattern, i.e. position 3/4/5 which also resulted in high  
218 affinity Fyn SH2 variant to the EPQpYEEIPIYL peptide, in addition to the previously identified  
219 pattern positioning in the K8L as well as the K8L related variants as shown above.

220

#### 221 *Identification of new superbinders based on binding affinity*

222 To determine which variants were new superbinders in our study, we measured the binding  
223 affinities of those variants that had low EC50 (<200nM) with EPQpYEEIPIYL peptide by  
224 FP(Fluorescence polarization). As shown in Table 2 and Figure 4a, the wild type Fyn SH2 binds  
225 to the pTyr peptide with a KD of 327nM , which was similar to the result of the previously  
226 study[20]. The triple mutant SH2 had a KD of 20nM (Figure 4b), which was also in the affinity  
227 range of the mutant binding to the pTyr peptides reported previously [20]. All the other  
228 variants from this study had tighter binding affinity to the pTyr peptide than the wild type Fyn  
229 SH2 does. The variant V10 (T4V/K8L), also identified in the previous study [20], had a binding  
230 affinity of 32nM (Figure 4c), which was slightly weaker than the triple mutant. This is also  
231 consistent with the previous data [20]. Variant V17(T4N/A5S/K8L) has an unusual threonine to  
232 asparagine mutation and alanine to serine mutation at position 4 and 5, respectively, resulting  
233 in a 4-fold affinity increase to the wild type Fyn SH2 domain, whereas 4-fold weaker than the  
234 triple mutant (Figure 4d). Variants V13(T3S/T4R/S6A/K8L) and V24(T3S/T4S/S6A/K8L) have the  
235 same S6A/K8L mutation as the triple mutant(T4V/S6A/K8L) does, meanwhile completely  
236 different type of residues at position 4, i.e. positive charged(T4R) and hydrophilic(T4S) residues,  
237 respectively. However, variant V13 has a KD of 12nM (Figure 4e) which is slightly tighter than  
238 the triple mutant meanwhile variant V24 has a KD of 23nM(Figure 4f) which is very close to the  
239 triple mutant. In addition, variant V3 (T3S/T4W/A5G) has an KD of 38 nM (Figure 4g), which is

240 8.6-fold tighter than the the wild type Fyn SH2 domain, although is slightly weaker than the  
241 triple mutant. So far, we have identified 5 variants (V10, V17, V13, V24 and V3) from this study  
242 that have high affinity as their binding affinities to peptide EPQpYEEIPIYL are under 40nM. To  
243 verify if they can bind the pTyr moiety alone like the triple mutant, we synthesized an artificial  
244 peptide GGpYGG and tested its binding affinities to the above 5 variants by Fluorescence  
245 polarization, respectively. As indicated in Table 1 and Figure 5, the triple mutant binds to the  
246 GGpYGG peptide with a KD of 0.68 $\mu$ M, which is consistent with the previous result(0.71 $\mu$ M)  
247 [20]. Variant V10 (T4V/K8L) had a binding affinity of 2.7 $\mu$ M with peptide GGpYGG *versus* 3.1 $\mu$ M  
248 in the previous study [20]. Variants V13 (T3S/T4R/S6A/K8L) and V24 (T3S/T4S/S6A/K8L) had the  
249 binding affinities of 0.62  $\mu$ M and 2.57  $\mu$ M, respectively, likely because that they share the same  
250 S6A/K8L with the triple mutant. Surprisingly, variant V17 (T4N/A5S/K8L) had almost no binding  
251 to GGpYGG peptide. In the previous study, variant with the K8L mutation bound to the GGpYGG  
252 peptide with the affinity of 13 $\mu$ M[20]. It is likely that the T4N/A5S mutation is deteriorative to  
253 the pTyr binding pocket in terms of binding to the pTyr moiety. Interestingly, variant  
254 V3(T3S/T4W/A5G), though having the position 4&5 mutation, bound to the GGpYGG peptide  
255 with an affinity of 1.63 $\mu$ M. Based on the binding affinity data, we named the variant V13, V24  
256 and V3 the newly identified SH2 superbinders.

257

### 258 *Superbiners have slower dissociation rates*

259 To further understand how those superbinders obtained the super binding capability kinetically,  
260 we measured their association and dissociation rates binding to the EPQpYEEIPIYL peptide by  
261 Biolayer Interferometry (BLI) assay while using the wild type Fyn SH2 as a control. As seen in  
262 the Figure 6 and Table 1 the wild type Fyn SH2 has a  $k_{on}$  rate of 6.48E+04 Ms<sup>-1</sup>, which is  
263 comparable to most conventional antibodies binding to their antigens. However, the  $K_{off}$  is  
264 1.00E-02 s<sup>-1</sup>, resulting in a measured KD of 154nM, which is relatively strong for the physiologic  
265 interactions. Interestingly, the triple mutant has a  $k_{on}$  rate of 1.63E+04 Ms<sup>-1</sup>. Though almost 4-  
266 fold slower than the wild type Fyn SH2, it has a two order decrease in  $k_{off}$  rate, which is 8.88E-04  
267 s<sup>-1</sup>, leading to a measured KD of 55nM. The increased  $k_{off}$  rate is consistent with the fact that  
268 the T4V/S6A/K8L mutation in the triple mutant created a hydrophobic patch engaging the

269 aromatic ring of the pTyr moiety with hydrophobic interaction[20]. Similarly, both the newly  
270 identified variants V13 and V24 in this study have close  $k_{on}$  rate as the wild type domain does,  
271 but much slower  $k_{off}$  rate. This is likely due to the S6A/K8L combinatorial mutation that creates  
272 the extra hydrophobic interaction with the pTyr aromatic ring, even though they have positive  
273 charge residue, arginine, and hydrophilic residue, serine, at position 4, respectively. Conversely,  
274 the variant V3 has a 7-fold slower  $k_{on}$  rate than that of the wild type SH2 domain, which is  
275  $8.48E+03 \text{ Ms}^{-1}$ . However the  $k_{off}$  rate of V3 (T3S/T4W/A5G) is  $4.63E-04 \text{ s}^{-1}$ , making its binding  
276 affinity as high as the triple mutant(T4V/S6A/K8L), i.e. 55nM. The different mutation  
277 combination in the protein primary sequence and the  $k_{on}$  rate of V3 imply that it binds to the  
278 pTyr peptide in a different mode from the triple mutant(T4V/S6A/K8L).

279

280 *Variant V3 has not only high affinity but also high specificity to the pTyr peptide*

281 It was reported that the triple mutant(T4V/S6A/K8L) its variants can bind to sulfotyrosine  
282 peptide, in addition to the phosphopeptide [21]. To test if the superbinders discovered in our  
283 study could also have this dual function, we prepared the phage solutions that displaying the  
284 triple mutant SH2 domain, variant V13 and variant V3, respectively. In a phage ELISA assay, the  
285 variant V13, behaving similarly to the triple mutant SH2 domain, bound both sulfotyrosine  
286 peptide (EPQsYEEIPIYL) and phosphopeptide (EPQpYEEIPIYL) (Figure 7a). Interestingly, the  
287 variant V3 bound exclusively to the phosphopeptide, but not to the sulfotyrosine peptide at all.  
288 When expressed as proteins, the variant V13 and V3 showed the similar binding specificities to  
289 pTyr and sTyr as measured by protein ELISA (Figure 7b). Based on this finding, we deduced that  
290 the T3S/T4W/A5G mutation of variant V3 give rise to not only the interaction with the aromatic  
291 ring of the tyrosine, but also discriminating the modification groups (ie.  $\text{PO}_4^{3-}$  and  $\text{SO}_4^{2-}$ ) of  
292 tyrosine.

293

## 294 Discussion

295  
296 In this study, we revisited the pTyr binding pocket of Fyn SH2 domain by randomizing only 8  
297 positions in the pocket. Although the theoretical diversity of the mutation is  $2.56 \times 10^{10}$  ( $20^8$ ), the  
298 actual library size we constructed is  $1.29 \times 10^9$  and the expected clones is about 60% as  
299 exemplified by DNA deep sequencing. Nonetheless, we were able to get 12 pTyr binders with  
300 enhanced binding affinities, likely due to the bias design of this library (See Methods). Soft  
301 randomization method, in which the wild type residues have the dominant proportion, is widely  
302 used in *in vitro* affinity maturation, especially for antibody engineering [17, 27, 28]. The  
303 rationale is that if a residue in the binding pocket contributes less to the binding affinity, the  
304 other one(s) will show up during the biopanning by affinity selection, even if this/these residue  
305 has/have fewer proportion at this position in the library. So only those residues that contribute  
306 more to the binding can compete with the wild type residues and show up in the final selected  
307 clones. From the logo generated from the 22 clones selected from this study, we found it is  
308 almost identical to the previous study[20], which verified the variability of those 8 positions in  
309 the pTyr binding pocket even in a smaller size library. However, among the 22 clones, there are  
310 only two clones overlap with those in the previous study (Table 2), implying that various  
311 mutation combinations could result in high affinity binders.

312  
313 Randomizing the key residues which contribute to binding is widely used in construction of  
314 library for affinity selecting in order to obtain higher affinity binders, e.g., *in vitro* affinity  
315 maturation in antibody engineering. A few library molecules (from 10 to a few hundred) were  
316 usually sent for Sanger sequencing to verify the mutation in the quality control stage. To  
317 answer if the actual library we constructed is in line with our design, we submit the whole  
318 library for deep sequencing by HiSeq and did the statistical analysis with the purpose of getting  
319 a higher resolution of the quality of our library. The NGS data showed that most mutation  
320 agreed with the design in spite of a few exceptions. The high quality of the library ensured us  
321 getting enough positive clones for the identification of superbinders in the screening stage.  
322 Although we got 22 positive clones from the initial biopanning, it didn't guaranty all of them are  
323 higher affinity binders. Despite all this, more than half of them have higher affinity than the

324 wild type Fyn SH2, 3 of which are superbinders as identified by measuring their binding  
325 constants. Therefore it is very likely to obtain high affinity binders by selecting a bias library  
326 against its cognate ligand. In conclusion, soft randomization is a powerful method to do *in vitro*  
327 affinity maturation, in addition to the error prone PCR method.

328  
329 There are growing evidences to show that stop codon read-through is a common phenomenon  
330 in bacteria [29], yeast [30] and human [31] for all three types of canonical stop codons, i.e. UAG,  
331 UGA and UAA. Stop codon read-through may be a molecular error [32] or more likely a  
332 programmed event in physiological condition [33]. The UGA read-through usually results in the  
333 translation of Tryptophan, Cysteine, or Arginine [30]. The 3' cytosine after UGA facilitates the  
334 read-through partially because of the compromised sampling ability of eRF1, which specifically  
335 senses cytosine at the +4 position [34, 35]. In our study, we found UGA read-through in the  
336 context of -UGAAA-[Figure S2]. Although not in the ideal context of -UGACU-, it was still  
337 translated into tryptophan, but not Cysteine or Arginine, as verified by mass spectrometry. Our  
338 finding is also supported by the conclusion from previous study that the -UGAA- tetranucleotide  
339 is preferentially read through by tryptophan nc-tRNA [34]. To our best knowledge, our finding is  
340 the first report about UGA read-through in a synthetic gene in the phage display system, which  
341 may help to rescue those sequences previously discarded in the sequence analysis as they have  
342 stop codons. For example, in *in vitro* antibody affinity maturation library design and  
343 construction, stop codons are inevitably introduced into the template during library  
344 construction either by error-prone PCR or soft randomization used in this study. Our finding  
345 could be a heads-up that those sequences with stop codons may be the true positive clones if  
346 enriched during biopanning.

347  
348 As the UGA is decoded as Trp in variant V3, the T4W mutation may increase the hydrophobicity  
349 in the pTyr binding pocket. Furthermore, the T3S and A5G mutations may make more space in  
350 the pocket to accommodate the pTyr moiety as those two positions were replaced by two  
351 amino acids with smaller side chain. Although the 3D structure of V3 remains resolved, we  
352 reasoned that the T3S/T4W/A5G mutation generated increased interaction force between the

353 pTyr moiety and the pTyr pocket while kept the structure of the SH2 variant and the pTyr  
354 binding pocket intact . That also makes V3 a different superbinder type from the triple mutant  
355 (T4V/S6A/K8L). It is also understandable that that variants V13 (T3S/T4R/S6A/K8L) and V24  
356 (T3S/T4S/S6A/K8L) are superbinders as they share the same mutation pattern with the triple  
357 mutant (T4V/S6A/K8L) at position 6 and position 8. Based on the data of these three variants  
358 (V13, V24 and the triple mutant), we deduced that the K8L is a crucial mutation to increase the  
359 binding affinity as verified in this and the previous studies[20]. We hypothesized that K8L  
360 mutation in any Fyn SH2 variant contributes to the binding affinity as verified in this study, i.e.  
361 variant V8, V5, V17 from this study, etc., in addition to the V13 and V24.

362

363 In summary, we have identified three SH2 superbinders in addition to the first generation triple  
364 mutant by engineering the pTyr binding pocket of Fyn SH2 domain. Like the first triple mutant,  
365 the newly identified superbinders may be applied in profiling the phosphorylation level of tissue  
366 or even bear great promise as antagonists of tyrosine kinase signaling and thereby potential  
367 therapeutic agents.

368

369 **Material and Methods**

370

371 ***Phage display library construction through site-directed mutagenesis by Kunkel reaction***

372 The wild type human Fyn SH2 domain (Cys-less) in phagemid pFN-OM6 (ref) were used as the  
373 template for library construction. The dU-ssDNA of the Fyn SH2 domain as the template in  
374 Kunkel reaction was made as described before . Primer

375 1(GGAAAATTAGGAAGACCATGGGATGCTGAAAGACAA), Primer

376 2(CTTATCCGCGAGAGTCCATGGAAAGGTGCTAGCTATTCACCTTTCTATCCGTGAT),and

377 Primer 3(AAAGGAGACCATGTCTAAATTCGCAAACCTTGAC) were used in a combinatorial  
378 mutation to construct a “Stop template” by the Kunkel method, in which region1 was

379 incorporated with Nco I restriction enzyme recognition site CCATGG, region2 contained both

380 Nco I site(CCATGG) and Nhe I site(GCTAGC) and region3 included the stop codon TAA. After

381 that, Primer 4 (GGAAAACCTTGGCCGANNNGATGCTGAGCGACAG), Primer 5

382 (CTTATCCGCGAGAGTRNNNWWNWWAAAGGTRWWTATMWNCTTTCTATCCGTGAT

383 ) and Primer 6(AAAGGAGACCATGTCTNNNCATTATNNNATTCGCAAACCTTGAC) were

384 applied simultaneously to synthesize the heteroduplex double strand DNA (dsDNA), in which

385 the designed mutations at each position were incorporate into the “Stop template”. In these

386 primers, N was composed of the mixture of 70% of A, 10% of G, T and C, respectively; M

387 represented the mixture of 70% of T and 10% of A, G and C; R related to the mixture of 70% of

388 G, 10% of A, T and C; W contains 70% of A, 10% of T, G and C. The dsDNA was further

389 digested by the restriction enzymes Nco I and Nhe I to remove the unreacted template molecules

390 before the transformation into *E. coli* SS320 (preinfected by M13KO7) by electroporation. The

391 transformation efficiency (library diversity) was calculated by bacterial serial dilution as

392 described [25]. The resulting phage library was precipitated by PEG/NaCl (20% PEG 8000/2.5M

393 NaCl).

394

395 ***Library quality control by next generation sequencing***

396 Before library preparation, the quality of the DNA samples was assessed on a Bioanalyzer 2100

397 using a DNA 12000 Chip (Agilent). Sample quantitation was carried out using the Invitrogen’s

398 Picogreen assay. Library preparation was performed according to Illumina’s TruSeq Nano DNA

399 sample preparation protocol. The samples were sheared and uniquely tagged with one of

400 Illumina’s TruSeq LT DNA barcodes to enable library pooling for sequencing. The finished



401 libraries were quantitated using Invitrogen's Picogreen assay, and the average library size was  
402 determined on a Bioanalyzer 2100 using a DNA 7500 chip (Agilent). The Fyn SH2 DNA  
403 sequences was amplified by PCR using polymerase chain reaction (PCR) forward primer: 5'-  
404 TCCAGGCAGAAGAGTGGTAC-3' and PCR reverse primer: 5'-  
405 AAGTGTTTCAAACACTGGGCCC-3'. At last, the library was sequenced on the Illumina HiSeq  
406 X<sup>TM</sup> Ten sequencing system, generating 150 bp paired-end reads.

407  
408 Paired-end reads were merged using FLASH v1.2.11[36] with default parameters. The merged  
409 sequences were quality-filtered by trimmomatic [37] to remove sequences containing more than  
410 3% low-quality bp (Phred score < 3) bases. Sequences were dereplicated, filtered by primer,  
411 retaining sequences with identical primers. Then, all the sequences were translated to protein  
412 sequences using in-house perl script. Raw sequencing data for this study have been deposited in  
413 NCBI Sequence Read Archive database under accession number PRJNA664254.

414

#### 415 ***Phage biopanning***

416 The phage biopanning was performed as described before [25]. Briefly, 96-well microplate  
417 (NUNC, 442404) was coated with 4 pmol streptavidin (Solarbio,S9171) per well in 100 $\mu$ L  
418 1 $\times$ PBS (137 mM NaCl, 3 mM KCl, 8mM Na<sub>2</sub>HPO<sub>4</sub> and 1.5mM KH<sub>2</sub>PO<sub>4</sub>, pH=7.2) at 4°C  
419 overnight. The next morning, the solution in the well was discarded and 200 $\mu$ L/well 0.5% BSA  
420 (Bovine albumin, Aladdin, A104912) were added for blocking at room temperature for 1 hour.  
421 Biotinylated peptides (biotin-ahx-ahx-EPQYEEIPIYL and biotin-ahx-ahx-EPQpYEEIPIYL),  
422 16pmol/well in 100 $\mu$ L 1 $\times$  PBS (pH=7.2), were added into two separated wells, labelled as the  
423 non-pTyr well and the pTyr well, respectively. After incubation at room temperature for 1 hour,  
424 the solution were discarded and 100 $\mu$ L/well phage-displayed SH2 variant library ( $\sim 1.0 \times 10^{11}$   
425 phage clones) were added into the non-pTyr well for preclearance for 1 hour. Phage solution  
426 were then transferred into the pTyr well for 1 hour. Non-binding phage were washed away by PT  
427 buffer (1 $\times$ PBS+0.05% Tween) for at least 8 times. Bound phages were eluted by 100mM HCl  
428 100 $\mu$ L/well and neutralized by adding 1/8 volume of Tris-HCl (1M, pH=11). Half volume of the  
429 neutralized phage solution were then applied to infect 10-fold volume of actively growing *E. coli*  
430 XL1-blue (Stratagene) for 30 min at 37°C. Then the M13KO7 helper phage (NEB, N0315S)

431 were added at a final concentration of  $1 \times 10^{10}$  phage/mL for super infection for 45 min. The  
432 XL1-blue culture were added into 20-fold volume of 2YT medium (10 g yeast extract, 16 g  
433 tryptone, 5 g NaCl in 1L water) supplemented with Carb (carbenicillin, 50 mg/  $\mu$ L) and Kana  
434 (kanamycin, 25 mg/  $\mu$ L) at 37°C overnight (14-16 hours), 200rpm in a shaker. The overnight  
435 culture were centrifuged and the supernatant were precipitated by 1/5 volume of PEG/NaCl  
436 (20% PEG 8000/2.5M NaCl). The amplified phage in the pellets were re-suspended with 1mL  
437 1×PBS and applied as the input phage for the next round of panning. From the second round, the  
438 immobilized peptide decreased from 16pmol to 12pmol (2<sup>nd</sup> round), 10pmol (3<sup>rd</sup> round), 8pmol  
439 (4<sup>th</sup> round) to increase the stringency of the selection.

440

#### 441 ***Phage ELISA***

442 In a 96-well NUNC microplate, 2 pmol streptavidin were coated per well in 50 $\mu$ L 1×PBS at 4°C  
443 overnight. The next morning, the solution in the well was discarded and 100 $\mu$ L/well 0.5% BSA  
444 (Bovine albumin, Aladdin, A104912) was added for blocking at room temperature for 1 hour. In  
445 the pTyr wells, 8 pmol/well/50 $\mu$ L biotinylated phosphotyrosine peptides (biotin-ahx-ahx-  
446 EPQpYEEIPIYL) were added for immobilization for 1 hour at room temperature. Non-  
447 phosphorylated peptides were added in the non-pTyr wells as the negative control. The 2×50 $\mu$ L  
448 solution was added into the pTyr wells and non-pTyr wells, respectively, for binding for 1 hour.  
449 Non-binding phages were washed away 8 times by the PT buffer. 50uL anti-M13/HRP conjugate  
450 (Sino Biological, 11973) were added and incubated for 30 min. After wash by the PT buffer,  
451 50uL TMB substrate were added to develop according to the manufacturer's instruction. 100  $\mu$ L  
452 of 1.0 M H<sub>3</sub>PO<sub>4</sub> were added to stop the reaction and signals were read spectrophotometrically at  
453 450 nm in a plate reader. The readouts of pTyr and non-Tyr wells were recorded and the ratio of  
454 pTyr/ non-Tyr were calculated.

455

#### 456 ***Protein expression and purification***

457 The cDNA encoding the Fyn SH2 variants in the pFN-OM6 vector were PCR amplified and  
458 subcloned into the vector pHH0239 to express 6xHis-tag proteins at the N-terminus. The  
459 expression constructs were transformed in to *E. coli* BL21 (DE3). Single colonies were picked  
460 and grown in 2YT/Carb medium at 37°C to OD<sub>600</sub>=0.6. IPTG were added to final concentration  
461 of 1mM and protein expression was induced at 18 °C overnight. Protein were purified using Ni-

462 NTA agrose (Qiagen, 30210) according to the manufacturer's manual. The eluted proteins were  
463 buffer exchanged into TBS (20 mM Tris-HCl, pH 7.0 and 150 mM NaCl) by Amicon Ultra-4  
464 Centrifugal Filter Units (Millipore). The final concentrations of the proteins were determined by  
465 the BCA method.

466

#### 467 ***EC50 assay***

468 In a 96-well NUNC microplate, 1 pmol SH2 proteins were coated per well in 50 $\mu$ L 1 $\times$ PBS at  
469 4 $^{\circ}$ C overnight. 100 $\mu$ L/well 0.5% BSA were added for blocking. A serial biotinylated pTyr  
470 peptides with increased concentration (from 0nM, 3.125nM, 6.25nM to 100nM and 200nM)  
471 were added in 9 wells coated with SH2 proteins. The wells were washed 4 times by the PT buffer  
472 after incubation for 1 hour at room temperature. 50  $\mu$ L of Streptavidin-HRP conjugate (Sigma,  
473 S2438, 1:5000 dilution) were added to each well and incubated for 30 min. After washing 4  
474 times by the PT buffer, 50 $\mu$ L TMB substrates were add to develop color for 2 min. 100  $\mu$ L of 1.0  
475 M H<sub>3</sub>PO<sub>4</sub> were added to stop the reaction and signals were read spectrophotometrically at 450  
476 nm in a plate reader. EC50 and standard variation values were calculated using a 3-parameter  
477 logistic regression fit using Prism Software (GraphPad).

478

479

#### 480 **Fluorescence polarization binding assay**

481 Peptides were N-terminally labeled with fluorescein. The two 6-aminohexanoic acids (ahx) were  
482 used as a linker to couple fluorescein to the peptide. All binding assays were carried out at room  
483 temperature in phosphate-buffered saline (PBS) buffer at pH 7.4 and the signals were measured  
484 on an VICTOR Multilabel plate reader (Perkin Elmer). Dissociation constants (Kd) were derived  
485 from 8 to 12 data points assuming a one-site binding model. Independent measurements ( $n \geq 2$ )  
486 produced Kd values within 10% of the reported values. Kd and standard variation values were  
487 calculated using Prism Software (GraphPad).

#### 488 ***BLI(Bio-layer interferometry) assay***

489 The BLI experiments were carried out using an Octet RED96 System (ForteBio). The  
490 streptavidin biosensors (18-5019) were used to perform the measurement. The biotin-ahx-ahx-  
491 EPQpYEEIPIYL peptides were immobilized on the biosensor tip surface. All steps were

492 performed at 30°C with shaking at 1000 rpm in a black 96-well plate (Greiner 655209), with a  
493 working volume of 200 µL in each well. The Fyn SH2 variants in the running buffer  
494 (1×PBS+0.5% BSA+0.05% Tween) was applied for association for 120 seconds and dissociation  
495 for 300 seconds. The response data were normalized using Octet data analysis software version  
496 9.0.0.14 (ForteBio).

497

## 498 **Contribution**

499 LL and HH conceived the project. SL, DZ, YY, JS, NH, HL and DQ conducted the experiments.  
500 YZ, LL performed data analysis. HH, LL, SL and DQ wrote the manuscript.

501

## 502 **Conflict of Interest**

503 Y.Y. and H.H. are the employees of Shanghai Asia United Antibody Medical Co., Ltd. L.L., S.L.  
504 and H.H filed a provisional Chinese patent application that is related to this work.

## 505 **Acknowledgments**

506 This work was supported in part by funds from the National Natural Science Foundation of  
507 China (Grant No. 31770821 and 32071430 to LL); LL is supported by the “Distinguished Expert  
508 of Overseas Tai Shan Scholar” program. YZ is supported by the Qingdao Applied Research  
509 Project.

510

511

## 512 **References:**

- 513 1. Romero, P.A. and F.H. Arnold, *Exploring protein fitness landscapes by directed evolution*.  
514 *Nat Rev Mol Cell Biol*, 2009. **10**(12): p. 866-76.
- 515 2. Mandeck, W., *The game of chess and searches in protein sequence space*. *Trends in*  
516 *Biotechnology*, 1998. **16**(5): p. 200-202.
- 517 3. Wojcik, J., et al., *A potent and highly specific FN3 monobody inhibitor of the Abl SH2*  
518 *domain*. *Nat Struct Mol Biol*, 2010. **17**(4): p. 519-27.
- 519 4. Grebien, F., et al., *Targeting the SH2-kinase interface in Bcr-Abl inhibits leukemogenesis*.  
520 *Cell*, 2011. **147**(2): p. 306-19.

- 521 5. Sha, F., et al., *Dissection of the BCR-ABL signaling network using highly specific*  
522 *monobody inhibitors to the SHP2 SH2 domains*. Proc Natl Acad Sci U S A, 2013. **110**(37):  
523 p. 14924-9.
- 524 6. Bloom, L. and V. Calabro, *FN3: a new protein scaffold reaches the clinic*. Drug Discov  
525 Today, 2009. **14**(19-20): p. 949-55.
- 526 7. Knappik, A., et al., *Fully synthetic human combinatorial antibody libraries (HuCAL) based*  
527 *on modular consensus frameworks and CDRs randomized with trinucleotides*. J Mol Biol,  
528 2000. **296**(1): p. 57-86.
- 529 8. Sidhu, S.S., et al., *Phage-displayed antibody libraries of synthetic heavy chain*  
530 *complementarity determining regions*. J Mol Biol, 2004. **338**(2): p. 299-310.
- 531 9. Binz, H.K., et al., *Designing repeat proteins: well-expressed, soluble and stable proteins*  
532 *from combinatorial libraries of consensus ankyrin repeat proteins*. J Mol Biol, 2003.  
533 **332**(2): p. 489-503.
- 534 10. Frejd, F.Y. and K.T. Kim, *Affibody molecules as engineered protein drugs*. Exp Mol Med,  
535 2017. **49**(3): p. e306.
- 536 11. Grabulovski, D., M. Kaspar, and D. Neri, *A novel, non-immunogenic Fyn SH3-derived*  
537 *binding protein with tumor vascular targeting properties*. J Biol Chem, 2007. **282**(5): p.  
538 3196-204.
- 539 12. Ernst, A., et al., *A strategy for modulation of enzymes in the ubiquitin system*. Science,  
540 2013. **339**(6119): p. 590-5.
- 541 13. Boder, E.T., K.S. Midelfort, and K.D. Wittrup, *Directed evolution of antibody fragments*  
542 *with monovalent femtomolar antigen-binding affinity*. Proc Natl Acad Sci U S A, 2000.  
543 **97**(20): p. 10701-5.
- 544 14. Hawkins, R.E., S.J. Russell, and G. Winter, *Selection of phage antibodies by binding*  
545 *affinity: Mimicking affinity maturation*. Journal of Molecular Biology, 1992. **226**(3): p.  
546 889-896.
- 547 15. Steidl, S., et al., *In vitro affinity maturation of human GM-CSF antibodies by targeted*  
548 *CDR-diversification*. Mol Immunol, 2008. **46**(1): p. 135-44.
- 549 16. Chan, D.T.Y., et al., *Extensive sequence and structural evolution of Arginase 2 inhibitory*  
550 *antibodies enabled by an unbiased approach to affinity maturation*. Proc Natl Acad Sci U  
551 S A, 2020. **117**(29): p. 16949-16960.
- 552 17. Huang, H., et al., *Selection of recombinant anti-SH3 domain antibodies by high-*  
553 *throughput phage display*. Protein Sci, 2015. **24**(11): p. 1890-900.
- 554 18. Wang, J., et al., *In vitro affinity maturation of antibody against membrane-bound GPCR*  
555 *molecules*. Appl Microbiol Biotechnol, 2019. **103**(18): p. 7703-7717.
- 556 19. Mulhern, T.D., et al., *The SH2 domain from the tyrosine kinase Fyn in complex with a*  
557 *phosphotyrosyl peptide reveals insights into domain stability and binding specificity*.  
558 Structure, 1997. **5**(10): p. 1313-1323.
- 559 20. Kaneko, T., et al., *Superbinder SH2 domains act as antagonists of cell signaling*. Sci  
560 Signal, 2012. **5**(243): p. ra68.
- 561 21. Bian, Y., et al., *Ultra-deep tyrosine phosphoproteomics enabled by a phosphotyrosine*  
562 *superbinder*. Nat Chem Biol, 2016. **12**(11): p. 959-966.

- 563 22. Liu, A.D., et al., *(Arg)9-SH2 superbinder: a novel promising anticancer therapy to*  
564 *melanoma by blocking phosphotyrosine signaling.* J Exp Clin Cancer Res, 2018. **37**(1): p.  
565 138.
- 566 23. Kunkel, T.A., K. Bebenek, and J. McClary, [6] *Efficient site-directed mutagenesis using*  
567 *uracil-containing DNA,* in *Methods in Enzymology.* 1991, Academic Press. p. 125-139.
- 568 24. Liu, B., S. Long, and J. Liu, *Improving the mutagenesis efficiency of the Kunkel method by*  
569 *codon optimization and annealing temperature adjustment.* N Biotechnol, 2020. **56**: p.  
570 46-53.
- 571 25. Huang, H., et al., *Creation of Phosphotyrosine Superbinders by Directed Evolution of an*  
572 *SH2 Domain.* Methods Mol Biol, 2017. **1555**: p. 225-254.
- 573 26. Dunant, N.M., A.S. Messerschmitt, and K. Ballmer-Hofer, *Functional interaction between*  
574 *the SH2 domain of Fyn and tyrosine 324 of hamster polyomavirus middle-T antigen.* J  
575 Virol, 1997. **71**(1): p. 199-206.
- 576 27. Stack, E., et al., *In vitro affinity optimization of an anti-BDNF monoclonal antibody*  
577 *translates to improved potency in targeting chronic pain states in vivo.* MAbs, 2020.  
578 **12**(1): p. 1755000.
- 579 28. Tundidor, Y., et al., *Affinity-matured variants derived from nimotuzumab keep the*  
580 *original fine specificity and exhibit superior biological activity.* Sci Rep, 2020. **10**(1): p.  
581 1194.
- 582 29. Baggett, N.E., Y. Zhang, and C.A. Gross, *Global analysis of translation termination in E.*  
583 *coli.* PLoS Genet, 2017. **13**(3): p. e1006676.
- 584 30. Blanchet, S., et al., *New insights into the incorporation of natural suppressor tRNAs at*  
585 *stop codons in Saccharomyces cerevisiae.* Nucleic Acids Res, 2014. **42**(15): p. 10061-72.
- 586 31. Loughran, G., et al., *Stop codon readthrough generates a C-terminally extended variant*  
587 *of the human vitamin D receptor with reduced calcitriol response.* J Biol Chem, 2018.  
588 **293**(12): p. 4434-4444.
- 589 32. Li, C. and J. Zhang, *Stop-codon read-through arises largely from molecular errors and is*  
590 *generally nonadaptive.* PLoS Genet, 2019. **15**(5): p. e1008141.
- 591 33. Eswarappa, S.M., et al., *Programmed translational readthrough generates*  
592 *antiangiogenic VEGF-Ax.* Cell, 2014. **157**(7): p. 1605-18.
- 593 34. Beznoskova, P., S. Gunisova, and L.S. Valasek, *Rules of UGA-N decoding by near-cognate*  
594 *tRNAs and analysis of readthrough on short uORFs in yeast.* RNA, 2016. **22**(3): p. 456-66.
- 595 35. Li, G. and C.M. Rice, *The signal for translational readthrough of a UGA codon in Sindbis*  
596 *virus RNA involves a single cytidine residue immediately downstream of the termination*  
597 *codon.* J Virol, 1993. **67**(8): p. 5062-7.
- 598 36. Magoc, T. and S.L. Salzberg, *FLASH: fast length adjustment of short reads to improve*  
599 *genome assemblies.* Bioinformatics, 2011. **27**(21): p. 2957-63.
- 600 37. Bolger, A.M., M. Lohse, and B. Usadel, *Trimmomatic: a flexible trimmer for Illumina*  
601 *sequence data.* Bioinformatics, 2014. **30**(15): p. 2114-20.
- 602
- 603

604 **Figures**

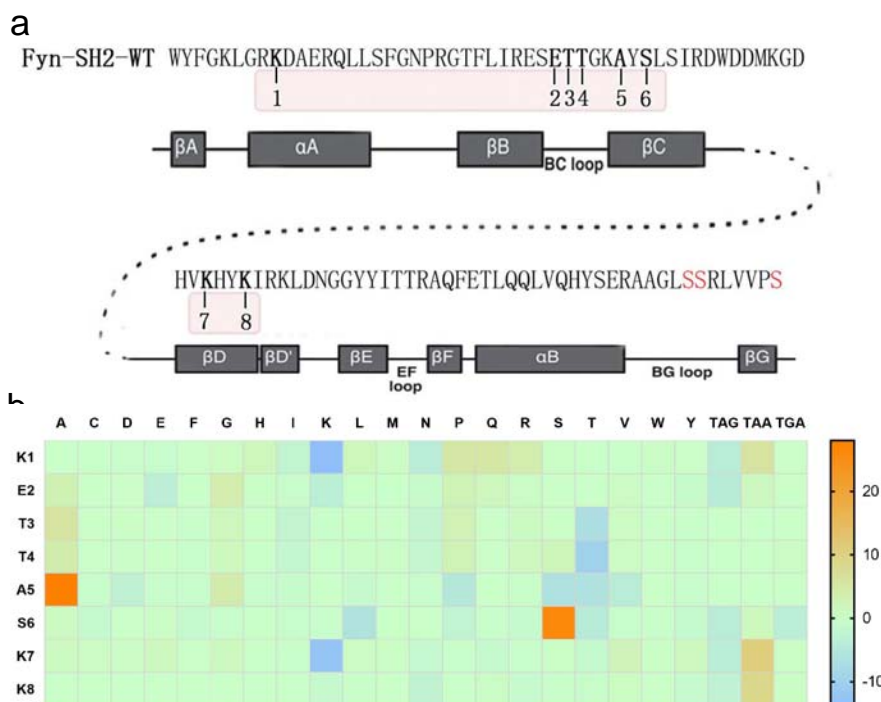

605

606 **Figure 1.** The construction of a Fyn SH2 domain variant library and quality control. a) Amino

607 acid sequence and secondary structure of Fyn SH2 domain. The 8 residues for mutation were

608 numbered. Mutagenesis were introduced by Kunkel method by three primers, in which primer

609 1 targeting residue 1 (Region 1), primer 2 targeting residues 2,3,4,5 and 6 (Region 2) and primer

610 3 targeting residue 7 and 8 (Region 3) to generate the “stop template”. Then three degenerated

611 primers, ie. primer4(targeting Region 1), primer5(targeting Region 2) and primer6(targeting

612 Region 3), were applied to introduced combinatorial mutations at Region 1, 2 and 3,

613 respectively to generate the library based on the “stop template”. b) The difference between

614 the actual amino acid distribution based on the deep-learning screening and the theoretical

615 amino acid distribution at the 8 positions were shown in the heat map.

616

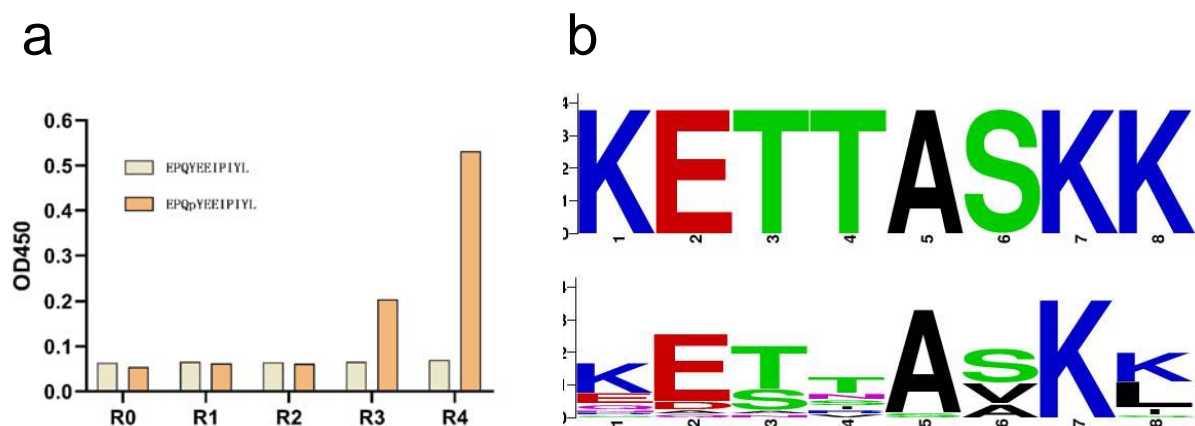

617  
618 **Figure 2** Biopanning of the Fyn SH2 variant library to enrich the pTyr binders. a) Phage ELISA of  
619 the selected phage from each biopanning round and the naïve library binding to the  
620 phosphotyrosine peptide (EPQpYEEIPIYL) and the non-phosphorylated counterpart, respectively.  
621 b) The sequences of ELISA confirmed single SH2 variant clones (n=22) were aligned and the  
622 sequences logo of the 8 positions was generated. The sequence of the 8 positions of wild type  
623 was also shown at the top for comparison.  
624



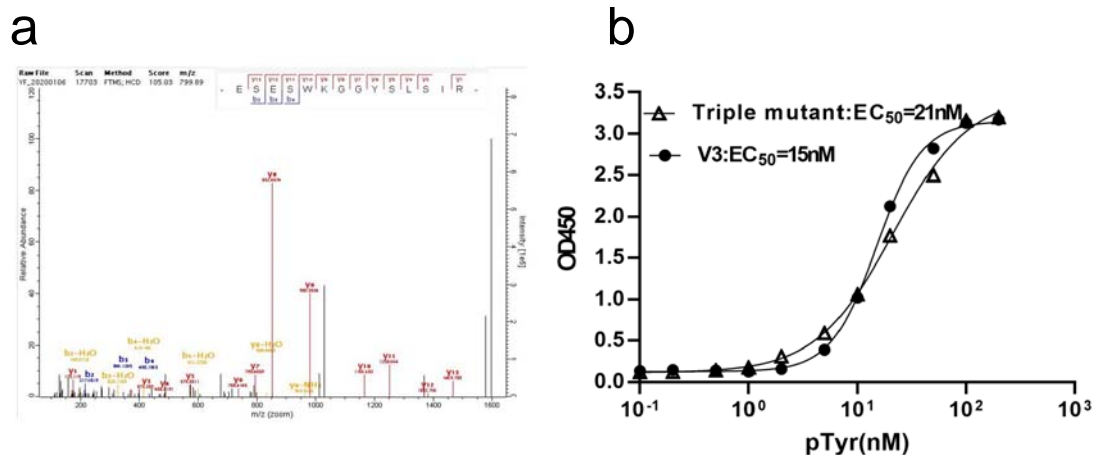

625  
 626 **Figure 3** Decoding of the opal stop codon UAG and its role in a functional SH2 variant. a) The V3  
 627 variant was expressed and purified. The sample was trypsin digested and submitted for mass  
 628 spectrometry assay. b) The EC50 assay of the V3 and triple mutant variants binding to the  
 629 phosphotyrosine peptide (EPQpYEEIPIYL).  
 630

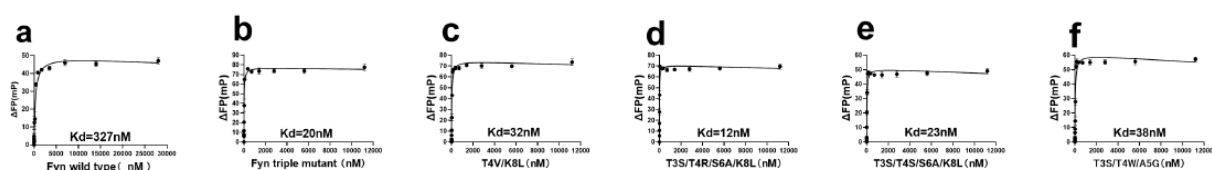

631  
 632 **Figure 4** Binding affinities of the SH2 variants to the phosphotyrosine peptide (EPQpYEEIPIYL)  
 633 measured by FP, including the wild type (a), the triple mutant (b), the variants V10 (c), V17 (d),  
 634 V13(e), v24 (f) and V13 (g).  
 635

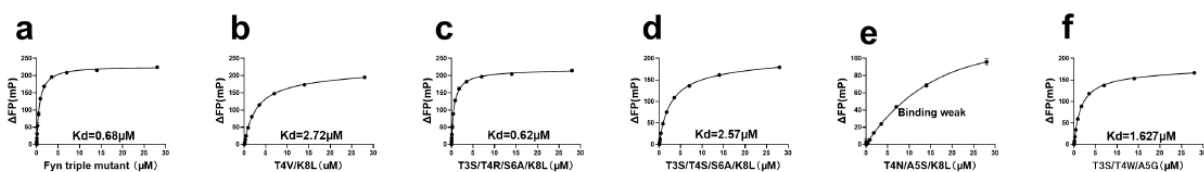

636

637 **Figure 5** Binding affinities of the SH2 variants to phosphotyrosine moiety (GGpYGG) measured  
 638 by FP, including the wild type (a), the triple mutant (b), the variants V10 (c), V17 (d), V13(e), v24  
 639 (f) and V13 (g).

640

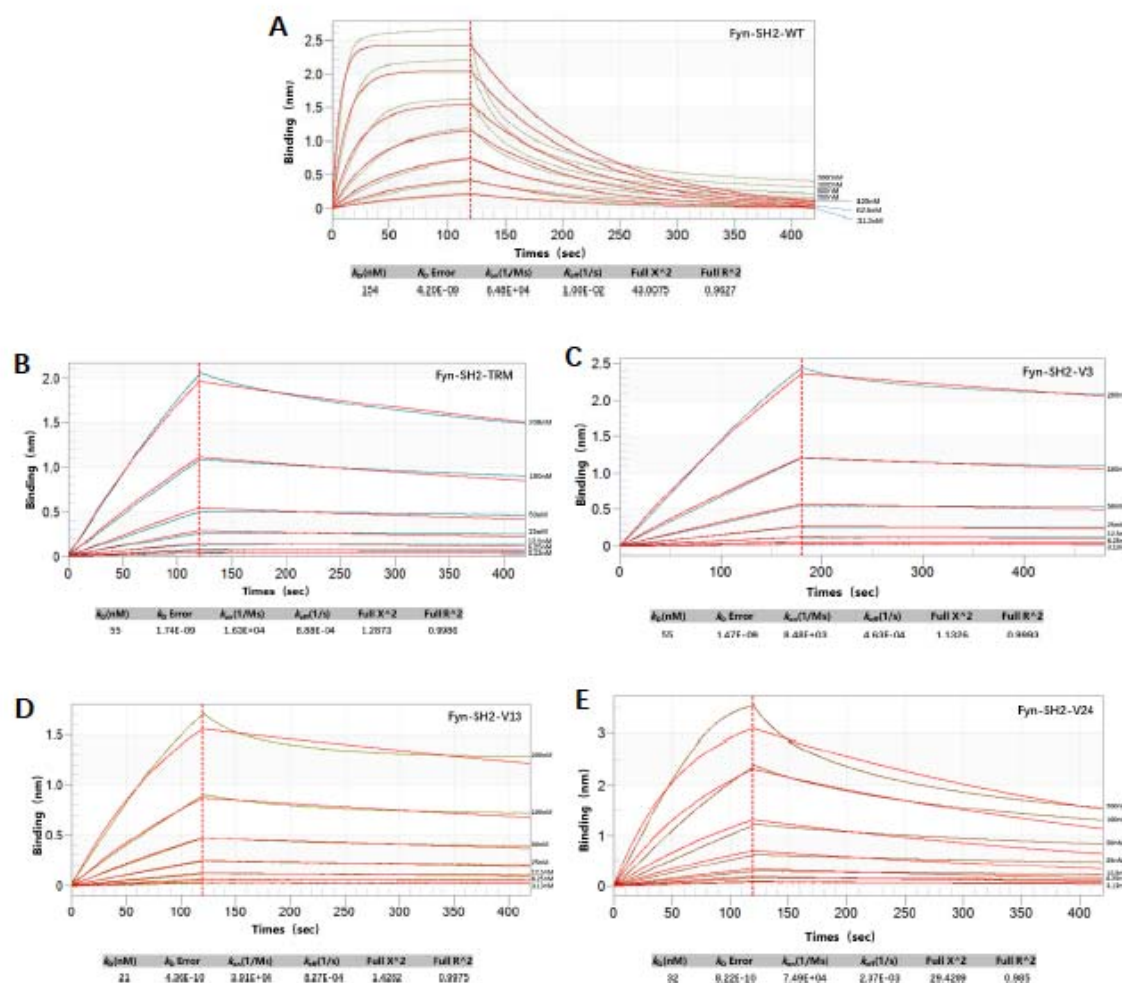

641  
 642 **Figure 6** Biolayer Interferometry (BLI) assay to measure the binding affinity of phosphotyrosine  
 643 peptide(EPQpYEEIPIYL) binding to a)wild type Fyn SH2, b)SH2 triple mutant(TRM), c)variant V3,  
 644 d)variant V13, e)variant V24.

645

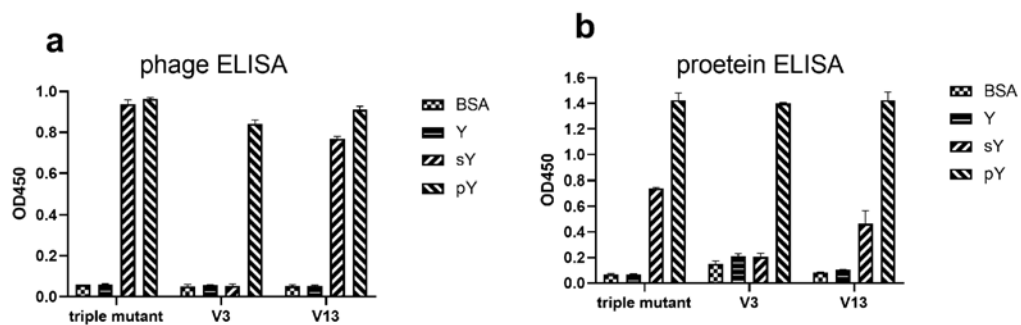

646

647 **Figure 7** Cross reactivity of wild type Fyn SH2, V3 and V13 binding to phosphotyrosine  
648 peptide(EPQpYEEIPIYL) and sulfotyrosine peptide(EPQsYEEIPIYL), respectively, measured by  
649 phage ELISA(a) and protein ELISA(b).

650

651

652

653 **Table 1** The amino acid residues at those 8 positions and the binding affinities of Fyn SH2

654 variants to phosphotyrosine peptides measured by different methods.

| ID      | Mutated residues      | Binding to EPQpYEEIPIYL |           |            |           |           | Binding to GGpYGG |     | Reported in Ref 20? |
|---------|-----------------------|-------------------------|-----------|------------|-----------|-----------|-------------------|-----|---------------------|
|         |                       | EC <sub>50</sub> (nM)   | FP/KD(nM) | BLI/KD(nM) | kon(1/Ms) | kdis(1/s) | FP/KD(μM)         |     |                     |
| WT(V12) | KETTASKK              | >1000                   | 327       | 154        | 6.48E+04  | 1.00E-02  |                   | Yes |                     |
| Trm     | KETVAAKL              | 21                      | 20        | 55         | 1.63E+04  | 8.88E-04  | 0.68              | Yes |                     |
| V1      | KETTASKL              | >500                    |           |            |           |           |                   | Yes |                     |
| V2      | KDTTAVKK              | >1000                   |           |            |           |           |                   | No  |                     |
| V3      | KESWGSKK              | 15                      | 38        | 55         | 8.48E+03  | 4.63E-04  | 1.63              | No  |                     |
| V4      | KETSAVKK              | >1000                   |           |            |           |           |                   | No  |                     |
| V5      | QETVASKL              | 200                     |           |            |           |           |                   | No  |                     |
| V6      | KETRAVKI              | >1000                   |           |            |           |           |                   | No  |                     |
| V7      | KESNAVKK              | >1000                   |           |            |           |           |                   | No  |                     |
| V8      | EQSTAAKL              | 66                      |           |            |           |           |                   | No  |                     |
| V9      | QDSIAAKI              | 200                     |           |            |           |           |                   | No  |                     |
| V10     | KETVASKL              | 175                     | 32        | 43         | 7.30E+04  | 3.17E-03  | 2.7               | Yes |                     |
| V13     | KESRAAKL              | 21                      | 12        | 21         | 3.91E+04  | 8.27E-04  | 0.62              | No  |                     |
| V14     | EESASKL               | >500                    |           |            |           |           |                   | No  |                     |
| V15     | EESTASKL              | >500                    |           |            |           |           |                   | No  |                     |
| V16     | RETTASKK              | >1000                   |           |            |           |           |                   | No  |                     |
| V17     | KETNSSKL              | 64                      | 84        |            |           |           | weak              | No  |                     |
| V18     | EETTASKK              | >1000                   |           |            |           |           |                   | No  |                     |
| V19     | SETSAVKK              | >1000                   |           |            |           |           |                   | No  |                     |
| V21     | NEATASKK              | >1000                   |           |            |           |           |                   | No  |                     |
| V22     | RETI <del>A</del> VKK | >1000                   |           |            |           |           |                   | No  |                     |
| V23     | RAT <del>T</del> ASKK | >1000                   |           |            |           |           |                   | No  |                     |
| V24     | KESSAAKL              | 40                      | 23        | 31         | 7.49E+04  | 2.37E-03  | 2.57              | No  |                     |

655

656

657

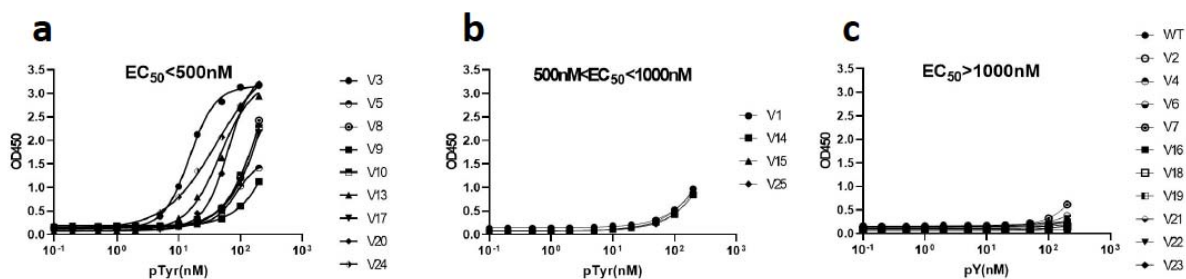

658

659 **Figure S1** EC<sub>50</sub> assay of the 22 SH2 variant proteins selected in this study. a) High affinity  
660 binders(EC<sub>50</sub><500nM) b) Moderate affinity binders(500nM<EC<sub>50</sub><1000nM) c) Low affinity  
661 binders(EC<sub>50</sub>>1000nM).

662

663 **Figure S2** Nucleotide and amino acid sequences of wild type Fyn SH2 domains. The 8 residues  
664 for mutated were shaded in yellow.

```

gctccagttgactctatccaggcagaagagtggtactttggaaaacttgccgaaaagat
A P V D S I Q A E E W Y F G K L G R K D
gctgagocagacgtattgtcctttggaaacccaagaggtacctttcttatccgcgagagt
A E R Q L L S F G N P R G T F L I R E S
gaaaccaccaaaggtgcctattcactttctatccggtgattgggatgatatgaaaggagac
E T T K G A Y S L S I R D W D D M K G D
catgtcaaacattatataaaattcgcaacttgacaatggtggatactacattaccaccgg
H V K H Y K I R K L D N G G Y Y I T T R
gccagtttgaaacacttcagcagctgtacaacattactcagagagagctgcagggtctc
A Q F E T L Q L V Q H Y S E R A A G L
tcctcccgcctagttccctctcacaaaggg
S S R L V V P S H K G
    
```

665

666 **Table S1** Theoretical and actual amino acid distribution at each position.

|     | K1     |         |               | E2     |         |               | T3     |         |               | T4     |         |               | A5     |         |               | S6     |         |               | K7     |         |               | K8     |         |               |
|-----|--------|---------|---------------|--------|---------|---------------|--------|---------|---------------|--------|---------|---------------|--------|---------|---------------|--------|---------|---------------|--------|---------|---------------|--------|---------|---------------|
|     | Design | Library | Library-Desig | Design | Library | Library-Desig | Design | Library | Library-Desig | Design | Library | Library-Desig | Design | Library | Library-Desig | Design | Library | Library-Desig | Design | Library | Library-Desig | Design | Library | Library-Desig |
| A   | 1.00%  | 1.00%   | 0.00%         | 7.00%  | 10.00%  | -3.00%        | 7.00%  | 12.91%  | -5.91%        | 7.00%  | 11.00%  | -4.00%        | 49.00% | 77.00%  | -28.00%       | 7.00%  | 8.00%   | -1.00%        | 1.00%  | 2.00%   | -1.00%        | 1.00%  | 1.00%   | 0.00%         |
| C   | 0.20%  | 0.00%   | 0.20%         | 0.20%  | 0.00%   | 0.20%         | 0.80%  | 1.00%   | 0.20%         | 0.80%  | 1.00%   | -0.20%        | 0.80%  | 0.00%   | 0.80%         | 1.40%  | 0.00%   | 1.40%         | 0.20%  | 1.00%   | -0.80%        | 0.20%  | 0.00%   | 0.20%         |
| D   | 1.40%  | 1.00%   | 0.40%         | 9.80%  | 9.89%   | -0.09%        | 0.80%  | 1.15%   | 0.35%         | 0.80%  | 1.06%   | -0.26%        | 5.60%  | 2.72%   | 2.88%         | 0.20%  | 0.10%   | 0.10%         | 1.40%  | 1.99%   | -0.59%        | 1.40%  | 1.25%   | 0.15%         |
| E   | 5.60%  | 4.75%   | 0.85%         | 39.20% | 35.69%  | 3.51%         | 0.20%  | 0.30%   | 0.10%         | 0.20%  | 0.32%   | -0.12%        | 1.40%  | 0.65%   | 0.75%         | 0.80%  | 1.36%   | -0.56%        | 5.60%  | 6.94%   | -1.34%        | 5.60%  | 5.57%   | 0.03%         |
| F   | 0.20%  | 0.23%   | -0.03%        | 0.20%  | 0.06%   | 0.14%         | 0.80%  | 0.43%   | -0.37%        | 0.80%  | 0.52%   | 0.28%         | 0.80%  | 0.01%   | 0.79%         | 1.40%  | 0.09%   | 1.31%         | 0.20%  | 0.25%   | -0.05%        | 0.20%  | 0.00%   | 0.20%         |
| G   | 1.00%  | 1.79%   | -0.79%        | 7.00%  | 10.83%  | -3.83%        | 1.00%  | 2.73%   | 1.73%         | 1.00%  | 2.53%   | -1.53%        | 7.00%  | 11.29%  | -4.29%        | 1.00%  | 0.45%   | 0.55%         | 1.00%  | 2.37%   | -1.37%        | 1.00%  | 1.16%   | -0.16%        |
| H   | 1.40%  | 3.06%   | -1.66%        | 1.40%  | 1.73%   | -0.33%        | 0.80%  | 0.68%   | -0.12%        | 0.80%  | 0.72%   | 0.08%         | 0.80%  | 0.10%   | 0.70%         | 0.20%  | 0.07%   | 0.13%         | 1.40%  | 1.30%   | 0.10%         | 1.40%  | 1.19%   | 0.21%         |
| I   | 6.30%  | 4.13%   | 2.17%         | 0.90%  | 0.25%   | 0.65%         | 6.30%  | 4.00%   | -2.30%        | 6.30%  | 4.50%   | 1.80%         | 0.90%  | 0.03%   | 0.87%         | 0.90%  | 0.10%   | 0.80%         | 6.30%  | 5.91%   | 0.39%         | 6.30%  | 6.12%   | 0.18%         |
| K   | 39.20% | 25.45%  | 13.75%        | 5.60%  | 2.19%   | 3.41%         | 1.40%  | 1.02%   | -0.38%        | 1.40%  | 1.31%   | 0.09%         | 0.20%  | 0.02%   | 0.18%         | 0.80%  | 0.33%   | 0.47%         | 39.20% | 26.69%  | 12.51%        | 39.20% | 38.10%  | 1.10%         |
| L   | 1.80%  | 3.41%   | -1.61%        | 1.80%  | 1.64%   | 0.16%         | 1.20%  | 1.13%   | -0.07%        | 1.20%  | 1.43%   | -0.23%        | 1.20%  | 0.10%   | 1.10%         | 6.60%  | 0.51%   | 6.09%         | 1.80%  | 2.60%   | -0.80%        | 1.80%  | 1.45%   | 0.35%         |
| M   | 0.70%  | 1.18%   | -0.48%        | 0.10%  | 0.08%   | 0.02%         | 0.70%  | 0.82%   | 0.12%         | 0.70%  | 0.95%   | -0.25%        | 0.10%  | 0.01%   | 0.09%         | 0.10%  | 0.03%   | 0.07%         | 0.70%  | 1.13%   | -0.43%        | 0.70%  | 0.78%   | -0.08%        |
| N   | 9.80%  | 5.81%   | 3.99%         | 1.40%  | 0.54%   | 0.86%         | 5.60%  | 3.46%   | -2.14%        | 5.60%  | 3.94%   | 1.66%         | 0.80%  | 0.06%   | 0.74%         | 0.20%  | 0.04%   | 0.16%         | 9.80%  | 8.16%   | 1.64%         | 9.80%  | 7.20%   | 2.60%         |
| P   | 1.00%  | 5.89%   | -4.89%        | 1.00%  | 3.51%   | -2.51%        | 7.00%  | 9.70%   | 2.70%         | 7.00%  | 9.62%   | -2.62%        | 7.00%  | 1.94%   | 5.06%         | 7.00%  | 4.47%   | 2.53%         | 1.00%  | 0.68%   | 0.32%         | 1.00%  | 0.86%   | 0.14%         |
| Q   | 5.60%  | 10.83%  | -5.23%        | 5.60%  | 7.22%   | -1.62%        | 0.20%  | 0.21%   | 0.01%         | 0.20%  | 0.25%   | -0.05%        | 0.20%  | 0.13%   | 0.07%         | 0.80%  | 0.39%   | 0.41%         | 5.60%  | 4.17%   | 1.43%         | 5.60%  | 6.25%   | -0.65%        |
| R   | 6.60%  | 10.42%  | -3.82%        | 1.80%  | 2.31%   | -0.51%        | 2.40%  | 3.31%   | 0.91%         | 2.40%  | 3.66%   | -1.26%        | 1.20%  | 0.85%   | 0.35%         | 1.80%  | 0.58%   | 1.22%         | 6.60%  | 6.23%   | 0.37%         | 6.60%  | 5.57%   | 1.03%         |
| S   | 2.40%  | 2.79%   | -0.39%        | 1.20%  | 1.24%   | -0.04%        | 12.60% | 12.72%  | 0.12%         | 12.60% | 14.66%  | -2.06%        | 7.80%  | 1.31%   | 6.49%         | 49.20% | 75.43%  | -26.23%       | 2.40%  | 2.80%   | -0.40%        | 2.40%  | 2.14%   | 0.26%         |
| T   | 7.00%  | 6.81%   | 0.19%         | 1.00%  | 0.90%   | 0.10%         | 49.00% | 41.80%  | -7.20%        | 49.00% | 39.25%  | 9.75%         | 7.00%  | 0.71%   | 6.29%         | 7.00%  | 2.73%   | 4.27%         | 7.00%  | 5.66%   | 1.34%         | 7.00%  | 6.51%   | 0.49%         |
| V   | 1.00%  | 0.93%   | 0.07%         | 7.00%  | 7.81%   | -0.81%        | 1.00%  | 1.87%   | 0.87%         | 1.00%  | 1.84%   | -0.84%        | 7.00%  | 2.98%   | 4.02%         | 1.00%  | 0.49%   | 0.51%         | 1.00%  | 3.27%   | -2.27%        | 1.00%  | 1.80%   | -0.80%        |
| W   | 0.10%  | 0.61%   | -0.51%        | 0.10%  | 0.28%   | -0.18%        | 0.10%  | 0.30%   | 0.20%         | 0.10%  | 0.28%   | -0.18%        | 0.10%  | 0.06%   | 0.04%         | 0.70%  | 0.29%   | 0.41%         | 0.10%  | 0.39%   | -0.29%        | 0.10%  | 0.17%   | -0.07%        |
| Y   | 1.40%  | 1.51%   | -0.11%        | 1.40%  | 0.54%   | 0.86%         | 0.80%  | 0.46%   | -0.34%        | 0.80%  | 0.53%   | 0.27%         | 0.80%  | 0.03%   | 0.77%         | 1.40%  | 0.18%   | 1.22%         | 1.40%  | 2.75%   | -1.35%        | 1.40%  | 0.38%   | 1.02%         |
| TAG | 4.90%  | 1.02%   | 3.88%         | 4.90%  | 0.64%   | 4.26%         | 0.10%  | 0.00%   | -0.10%        | 0.10%  | 0.01%   | 0.09%         | 0.10%  | 0.00%   | 0.10%         | 4.90%  | 0.87%   | 4.03%         | 4.90%  | 1.12%   | 3.78%         | 4.90%  | 2.24%   | 2.66%         |
| TAA | 0.70%  | 6.65%   | -5.95%        | 0.70%  | 1.82%   | -1.12%        | 0.10%  | 0.00%   | -0.10%        | 0.10%  | 0.01%   | 0.09%         | 0.10%  | 0.00%   | 0.10%         | 2.23%  | -1.53%  | 0.70%         | 11.50% | -10.80% | 0.70%         | 9.27%  | -8.57%  |               |
| TGA | 0.70%  | 0.73%   | -0.03%        | 0.70%  | 0.83%   | -0.13%        | 0.10%  | 0.00%   | -0.10%        | 0.10%  | 0.61%   | -0.51%        | 0.10%  | 0.00%   | 0.10%         | 4.90%  | 1.26%   | 3.64%         | 0.70%  | 1.09%   | -0.39%        | 0.70%  | 0.99%   | -0.29%        |

667

668

669 **TableS2** Quality control of the Fyn SH2 variant library by deep sequencing.

|                                |          |
|--------------------------------|----------|
| Total_Reads                    | 13539054 |
| Q20                            | 97.09%   |
| Q30                            | 93.40%   |
| DNA sequences after merge      | 6598936  |
| DNA sequences with PCR primers | 6156750  |
| DNA sequences after QC1        | 5934886  |

670
